# Supplementary material for: Evolution of Exon-Intron Structure and Alternative Splicing
Source: PLoS One. 2011 Mar 25;6(3):e18055. doi: 10.1371/journal.pone.0018055 (PMC3064661; doi:10.1371/journal.pone.0018055)
Supplement: Table S1 — Exon-intron gene structure in completely sequenced genomes of 56 species. (XLS) [file pone.0018055.s008.xls]

## Sheet: Table S1
Table S1. Exon-intron gene structure in completely sequenced genomes of 56 species.
species	set	taxonomic group	genes (UNmapped) / genes (all)	genes (all)	genes (protein coding)	genes (protein coding) / genes (all)	CDS (all)	exon count	exon length (mean)	std. dev. (exon length)	exon length (median)	CDS length (mean)	std. dev. (CDS length)	CDS length (median)	protein products / total number of protein genes	exon/gene	pseudogenes
Leishmania braziliensis	1	Excavata	0	7898	7897	0.999873	7898	7998	1844.83	1732.16	1383	1868.19	1770.95	1395	1.00013	1.01279	231
Leishmania infantum	1	Excavata	0	7993	7993	1	7993	8069	1839.92	1660.62	1401	1857.64	1719.97	1401	1	1.00951	193
Trypanosoma brucei	1	Excavata	0	9336	8772	0.939589	8772	8774	1506.18	1472.21	1158	1506.52	1472.27	1158	1	1.00023	916
Cryptosporidium parvum	1	Chromalveolata	0	3885	3396	0.874131	3396	3440	1821.12	1942.44	1321.5	1844.72	1945.51	1341	1	1.01296	0
Guillardia theta	1	Chromalveolata	0	742	632	0.851752	632	648	851.097	747.644	625.5	872.644	745.2	633	1	1.02532	1
Hemiselmis andersenii	1	Chromalveolata	0	524	471	0.898855	471	471	1018.25	808.591	774	1018.25	808.591	774	1	1	1
Plasmodium falciparum	1	Chromalveolata	0	5300	5263	0.993019	5267	12651	949.564	1766.97	201	2280.79	2588.61	1386	1.00076	2.40376	65
Theileria parva	1	Chromalveolata	0	4089	4035	0.986794	4035	14447	393.238	680.765	159	1407.96	1230.18	1080	1	3.58042	0
Dictyostelium discoideum	1	Amoebozoa	0	13322	13322	1	13331	30441	686.919	1016.36	314	1569.2	1510.93	1149	1.00068	2.28502	39
Aspergillus fumigatus	1	Fungi	0	9859	9630	0.976772	9630	28259	504.002	679.746	274	1478.98	1114.18	1248	1	2.93448	57
Aspergillus niger	1	Fungi	0	14420	14086	0.976838	14086	50371	370.369	565.135	176	1324.43	1103.94	1089	1	3.57596	11
Candida glabrata	1	Fungi	0	5499	5271	0.958538	5272	5356	1485.51	1104.12	1239	1509.18	1097.58	1260	1.00019	1.01613	0
Cryptococcus neoformans	1	Fungi	0	6407	6273	0.979085	6475	39350	257.217	327.768	150	1608.83	1105.79	1371	1.0322	6.27292	210
Debaryomyces hansenii	1	Fungi	0	7081	6866	0.969637	6872	7227	1274.32	1036.07	1059	1340.52	1026.73	1113	1.00087	1.05258	0
Encephalitozoon cuniculi	1	Fungi	0	2029	1996	0.983736	1996	2011	1072.34	812.218	846	1080.4	810.164	852	1	1.00752	0
Eremothecium gossypii	1	Fungi	0	4971	4714	0.9483	4714	4940	1406.13	1109.21	1164	1474.73	1093.87	1228.5	1	1.04794	2
Gibberella zeae	1	Fungi	0.00163525	11619	11619	1	11619	37454	477.17	699.63	242	1538.16	1233.61	1272	1	3.22351	0
Kluyveromyces lactis	1	Fungi	0	5504	5331	0.968568	5331	5461	1377.14	1062.86	1146	1410.73	1054.76	1173	1	1.02439	0
Magnaporthe grisea	0	Fungi	0.0520371	12395	12213	0.985317	12213	32689	498.317	695.721	245	1333.78	1152.55	1089	1	2.67657	106
Neurospora crassa	1	Fungi	0.0128802	10093	9699	0.960963	9709	26598	533.534	747.093	241	1462.59	1199.35	1215	1.00103	2.74234	14
Pichia stipitis	1	Fungi	0	5816	5816	1	5816	8383	1025.45	954.819	816	1478.06	1043.12	1251	1	1.44137	0
Saccharomyces cerevisiae	1	Fungi	0	6136	5861	0.955183	5861	6185	1412.63	1132.77	1179	1490.72	1149.24	1224	1	1.05528	21
Schizosaccharomyces pombe	1	Fungi	0	5374	5083	0.94585	5084	9844	722.874	964.652	338	1400.39	1101.62	1140	1.0002	1.93665	0
Ustilago maydis	1	Fungi	0.00408843	6604	6495	0.983495	6495	11373	1052.16	1242.15	569	1842.37	1363.9	1509	1	1.75104	0
Yarrowia lipolytica	1	Fungi	0	7180	6660	0.927577	6661	7402	1295.37	1086.56	1089	1439.67	1084.82	1191	1.00015	1.11141	0
Arabidopsis thaliana	1	Viridiplantae	0	28245	26977	0.955107	30705	138876	236.762	316.461	134	1208.03	883.613	1041	1.13819	5.14794	4759
Chlamydomonas reinhardtii	0	Viridiplantae		0	0												0
Oryza sativa	1	Viridiplantae	0	29102	26777	0.920109	26777	128267	250.156	353.869	132	1198.29	868.408	1023	1	4.79019	0
Ostreococcus 'lucimarinus'	1	Viridiplantae	0	7603	7603	1	7603	9767	944.76	1109.62	744	1213.66	1210.11	966	1	1.28462	37
Physcomitrella patens	0	Viridiplantae		0	0												0
Vitis vinifera	0	Viridiplantae	0.320745	18351	18299	0.997166	18947	105219	249.834	366.341	133	1424.4	1005.15	1191	1.03541	5.74999	3475
Caenorhabditis briggsae	1	Metazoa-Nematoda	0	17363	16429	0.946207	16429	98457	209.752	228.234	149	1257.11	1104.2	996	1	5.99288	49
Caenorhabditis elegans	1	Metazoa-Nematoda	0	21172	20174	0.952862	23759	124949	203.071	227.858	146	1321.97	1423.64	1029	1.1777	6.19357	0
Acyrthosiphon pisum	0	Metazoa-Arthropoda		0	0												0
Anopheles gambiae	1	Metazoa-Arthropoda	0.0405699	12423	11971	0.963616	12500	48875	358.181	470.53	205	1454.4	1533.06	1077	1.04419	4.08278	8
Apis mellifera	0	Metazoa-Arthropoda	0.384615	6604	6604	1	6661	46934	236.473	306.295	174	1675.88	1606.41	1272	1.00863	7.1069	232
Drosophila melanogaster	1	Metazoa-Arthropoda	0.0178294	14807	13887	0.937867	17837	56580	400.997	560.691	216	1719.76	1868.27	1266	1.28444	4.07431	73
Drosophila pseudoobscura	1	Metazoa-Arthropoda	0.0203789	11875	9606	0.808926	9707	39256	383.886	448.916	222	1553	1396.32	1206	1.01051	4.08661	0
Nasonia vitripennis	0	Metazoa-Arthropoda		0	0												0
Tribolium castaneum	0	Metazoa-Arthropoda	0.0791992	9091	8921	0.9813	8963	49253	296.528	374.404	192	1634.14	1607.73	1257	1.00471	5.52102	353
Hydra magnipapillata	0	Metazoa-Cnidaria		0	0												0
Ciona intestinalis	0	Metazoa-Chordata-Ascidiacea		0	0												0
Danio rerio	0	Metazoa-Chordata-Actinopterygii	0.115955	23811	23239	0.975977	23437	205026	180.877	298.541	125	1594.43	1684.4	1197	1.00852	8.8225	1287
Gallus gallus	0	Metazoa-Chordata-Aves	0.224229	15007	14823	0.987739	15263	143654	163.169	222.123	123	1581.26	1557.04	1161	1.02968	9.69129	1000
Taeniopygia guttata	0	Metazoa-Chordata-Aves	0.192015	11822	11744	0.993402	12195	125148	161.409	211.199	124	1723.35	1528.66	1305	1.0384	10.6563	1913
Bos taurus	0	Metazoa-Chordata-Mammalia	0.171067	20150	19395	0.962531	19685	161493	185.675	304.626	125	1561.31	1369.51	1170	1.01495	8.32653	3821
Canis lupus familiaris	1	Metazoa-Chordata-Mammalia	0.0195522	19384	19380	0.999794	31837	194624	169.184	243.811	124	1748.29	1599.64	1311	1.64278	10.0425	122
Equus caballus	0	Metazoa-Chordata-Mammalia	0.058486	17252	17150	0.994088	17808	175728	171.327	251.492	125	1764.2	1721.18	1323	1.03837	10.2465	3416
Homo sapiens	1	Metazoa-Chordata-Mammalia	0	25074	23055	0.919478	27904	201083	174.455	277.629	124	1548.44	1852.89	1128	1.21032	8.72188	7628
Macaca mulatta	0	Metazoa-Chordata-Mammalia	0.0846592	22124	22122	0.99991	31309	164189	175.874	256.211	124	1384.9	1270.32	1062	1.41529	7.42198	5095
Monodelphis domestica	0	Metazoa-Chordata-Mammalia	0.0745765	18062	17956	0.994131	19019	162640	180.554	267.131	126	1653.46	1439.6	1251	1.0592	9.0577	4403
Mus musculus	1	Metazoa-Chordata-Mammalia	0.00281219	26314	25533	0.97032	27159	200714	179.421	271.594	125	1420.85	1633.01	1002	1.06368	7.86096	6689
Ornithorhynchus anatinus	0	Metazoa-Chordata-Mammalia	8.37936	2122	2075	0.977851	2155	23044	162.149	243.926	123	1817.37	1522.84	1404	1.03855	11.1055	421
Pan troglodytes	1	Metazoa-Chordata-Mammalia	0.0313413	23962	23881	0.99662	40767	177922	170.193	240.312	122	1440.1	1342.36	1095	1.70709	7.45036	6671
Rattus norvegicus	0	Metazoa-Chordata-Mammalia	0.0598905	21556	21506	0.99768	21968	177693	179.599	263.056	126	1490.6	1424.97	1065	1.02148	8.26248	5752
Sus scrofa	0	Metazoa-Chordata-Mammalia	0	5812	5787	0.995699	6039	48234	173.905	237.189	125	1463.95	1259.02	1107	1.04355	8.33489	1342
Note:
set = 0 - species excluded from the analysis
set = 1 - species included into the analysis
